# Supplementary material for: Modulating the nonlinear optical properties of MAPbBr3 by metal ion doping
Source: Royal Society of Chemistry journal article supplement (doi:10.1039/d3tc04686a), 2024-01-01
Supplement: d3tc04686a1.pdf [file d3tc04686a1.pdf]

## Supporting information

### **Modulating the nonlinear optical properties of MAPbBr<sub>3</sub> by metal ions doping**

Bingkun Chen<sup>1,2</sup>, Qiuyun Ouyang<sup>1,2\*</sup>, Lin Chen<sup>1,2</sup>, Hao Huang<sup>3</sup>, Zijun Chen<sup>3</sup>, Junjie Pan<sup>4</sup>, Xuan Fang<sup>4\*</sup> and Bowen Zhang<sup>5\*</sup>

<sup>1</sup> Key Laboratory of Photonic Materials and Devices Physics for Oceanic Applications, Ministry of Industry and Information Technology of China, College of Physics and Optoelectronic Engineering, Harbin Engineering University, Harbin 150001, China.

<sup>2</sup> Key Laboratory of In-Fiber Integrated Optics of Ministry of Education, College of Physics and Optoelectronic Engineering, Harbin Engineering University, Harbin 150001, China.

<sup>3</sup> State Key Laboratory of Featured Metal Materials and Life-cycle Safety for Composite Structures; School of Resources, Environment and Materials; Guangxi University, Nanning 530004, China.

<sup>4</sup> State Key Laboratory of High Power Semiconductor Lasers, School of Science, Changchun University of Science and Technology, Changchun 130022, China.

<sup>5</sup> School of Science, Jiangxi University of Science and Technology, Ganzhou 341000, China.

\* Corresponding author

E-mail: qyouyang@hrbeu.edu.cn; fangx@cust.edu.cn; bowenzhang1993@163.com

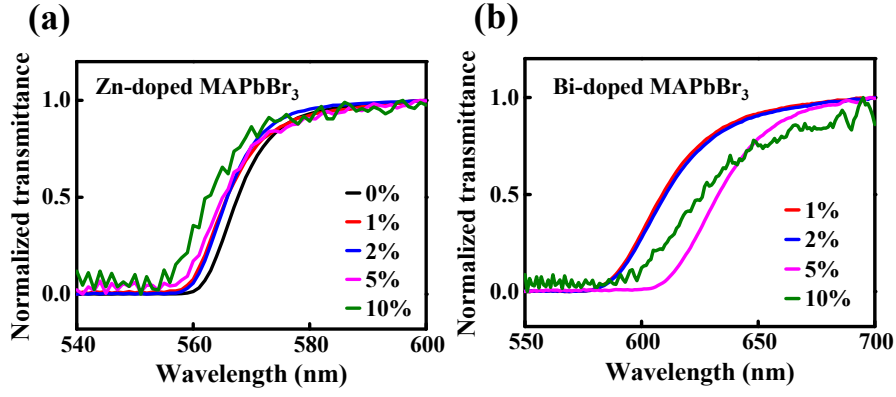

**Figure S1.** Transmission spectra of the undoped, Zn-doped and Bi-doped MAPbBr<sub>3</sub> with different doping concentrations.

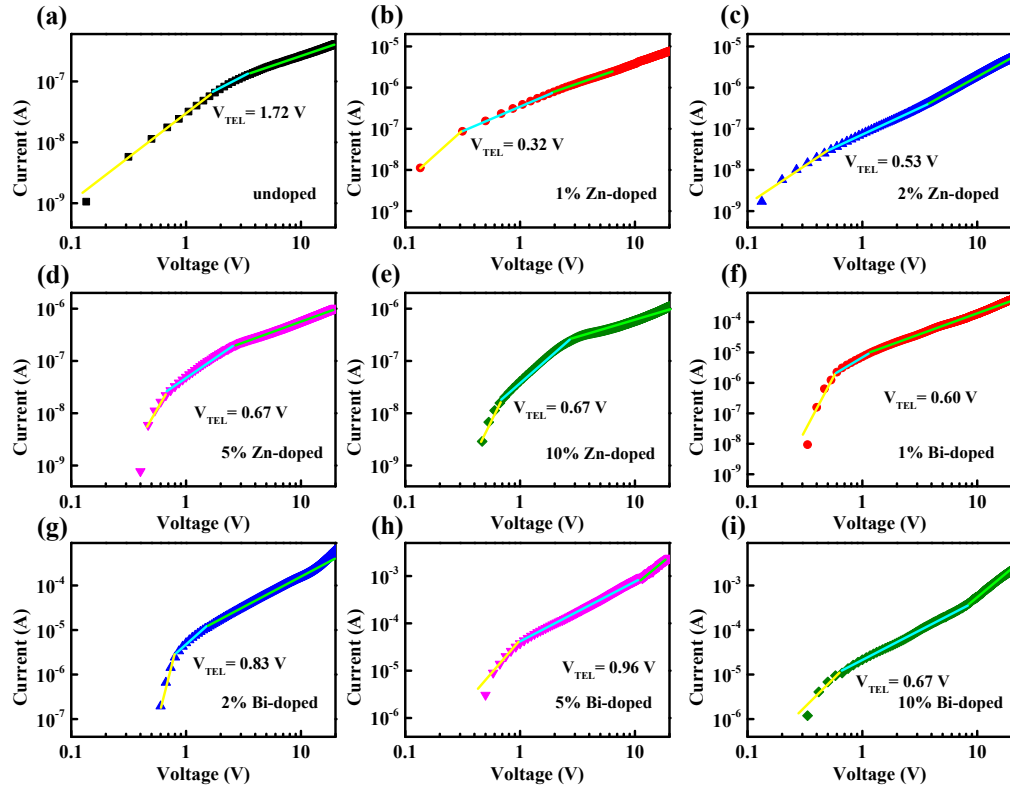

**Figure S2.** Double logarithmic current-voltage curves of the undoped, Zn-doped and Bi-doped MAPbBr<sub>3</sub>.

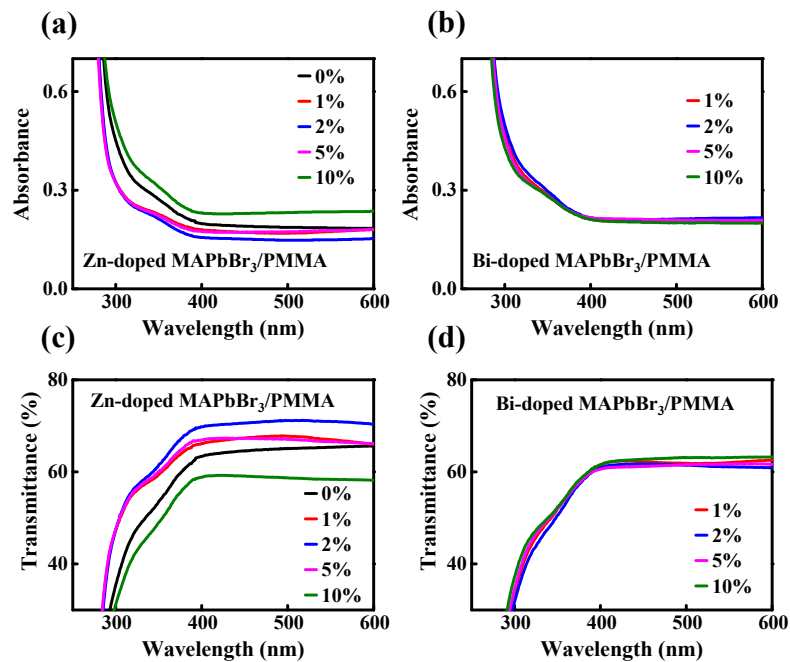

**Figure S3.** UV-vis absorption and transmission spectra of the undoped, Zn-doped and Bi-doped MAPbBr<sub>3</sub>/PMMA with different doping concentrations.

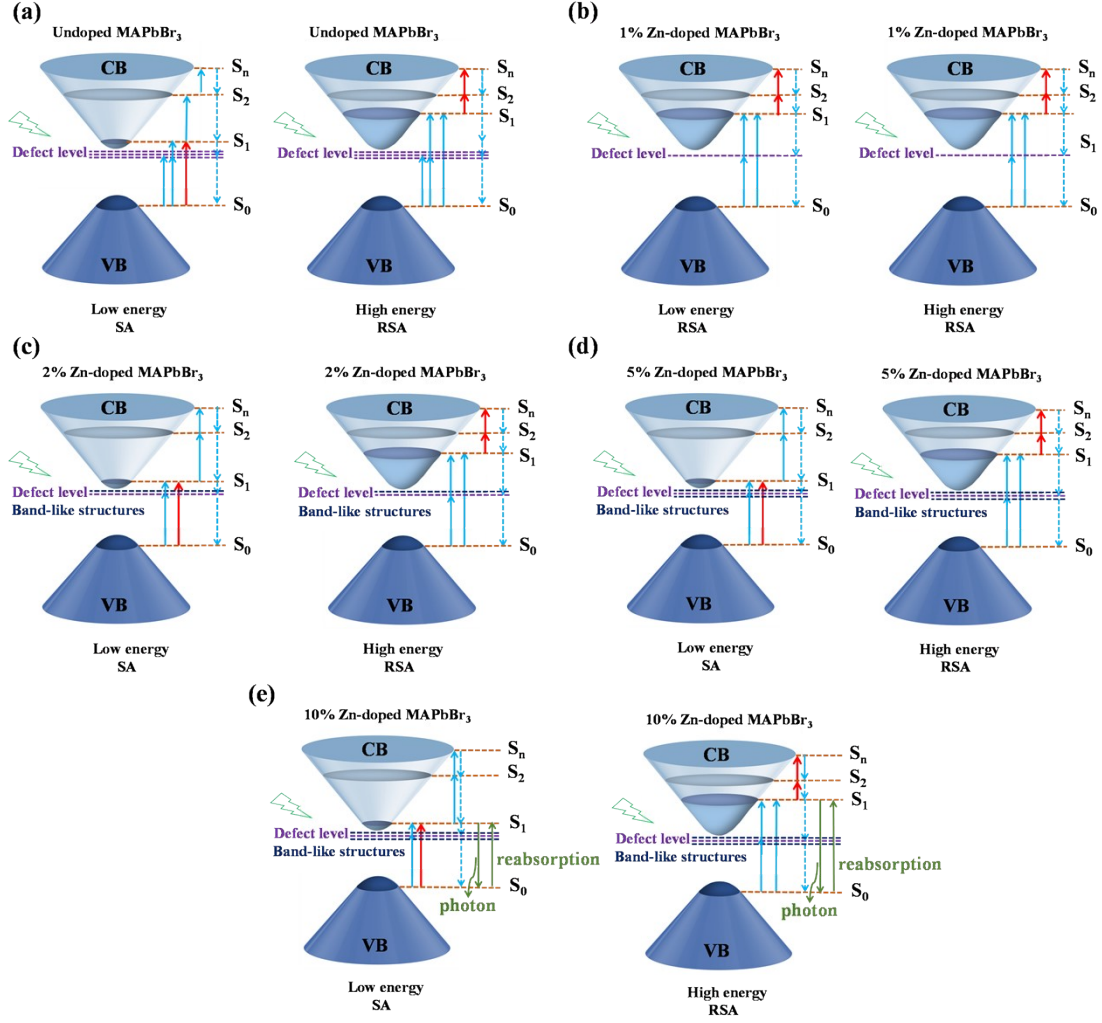

**Figure S4.** Four-level models of undoped and Zn-doped MAPbBr<sub>3</sub>/PMMA with different doping concentrations. (a) undoped ( 0% Zn-doped); (b) 1% Zn-doped; (c) 2% Zn-doped; (d) 5% Zn-doped; (e) 10% Zn-doped.

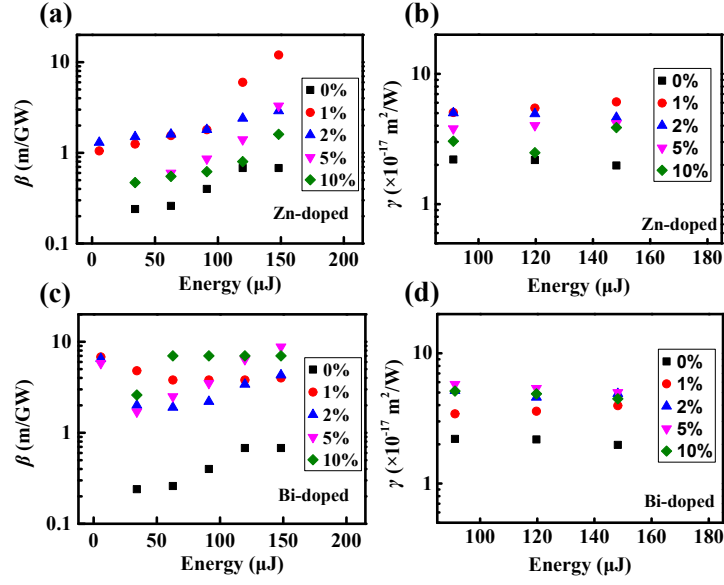

**Figure S5.** Dependence between  $\beta$  or  $\gamma$  and the incident pulse energy of undoped, Zn-doped and Bi-doped MAPbBr<sub>3</sub>/PMMA with different doping concentration.

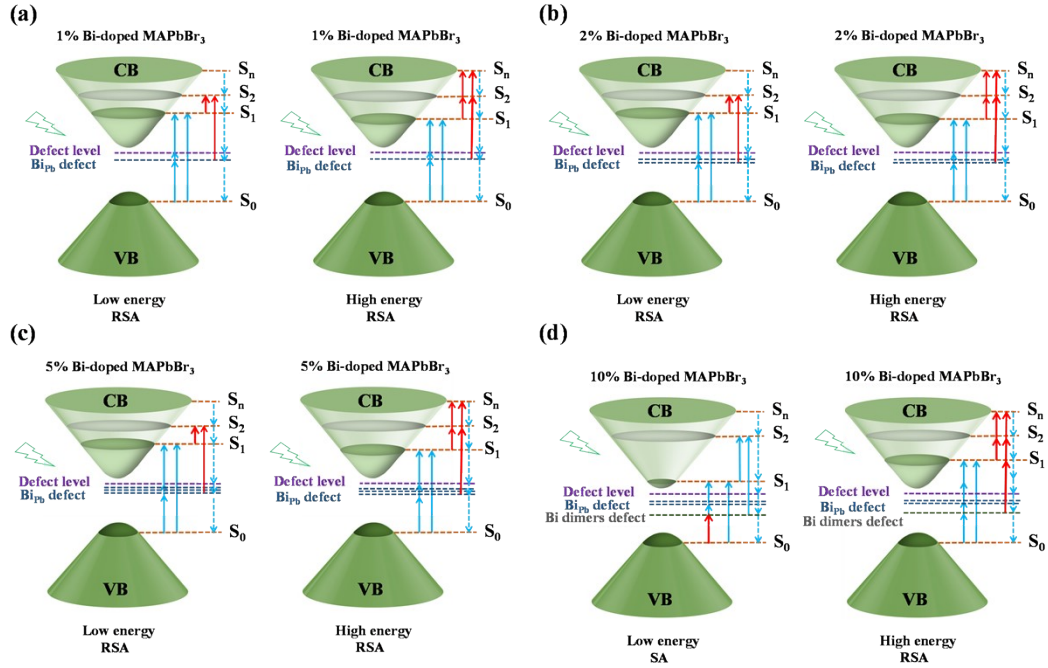

**Figure S6.** Four-level models of Bi-doped MAPbBr<sub>3</sub>/PMMA with different doping concentrations. (a) 1% Bi-doped; (b) 2% Bi-doped; (c) 5% Bi-doped; (d) 10% Bi-doped.
